# Supplementary material
Source: MDPI journal article supplement (https://www.mdpi.com/2227-9040/11/6/327)
Supplement: s1 [file s1]

## Supplementary Data

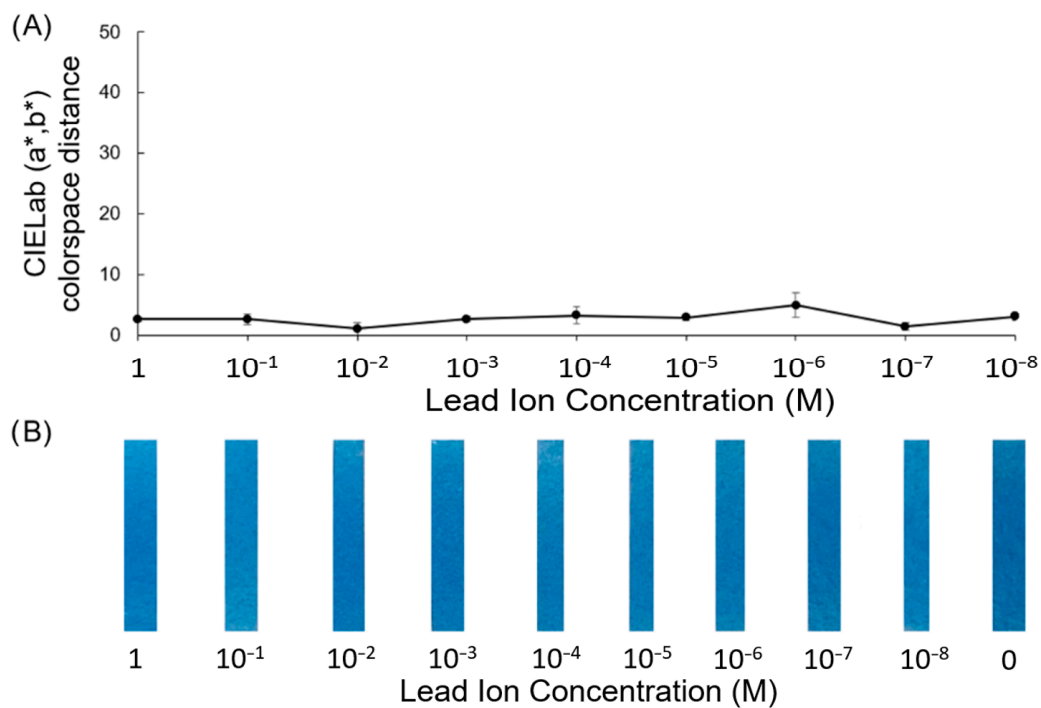

**Figure S1.** A) CIELab (a\*, b\*) distance for strips made by spray-on of PCDA as a comparative group (and not the dipicolylamine-conjugated lead sensor) exposed to serial dilutions of lead nitrate. B) Images of PCDA strips after partial submersion in lead nitrate solution of respective concentrations for 5 minutes showed no observable color change.

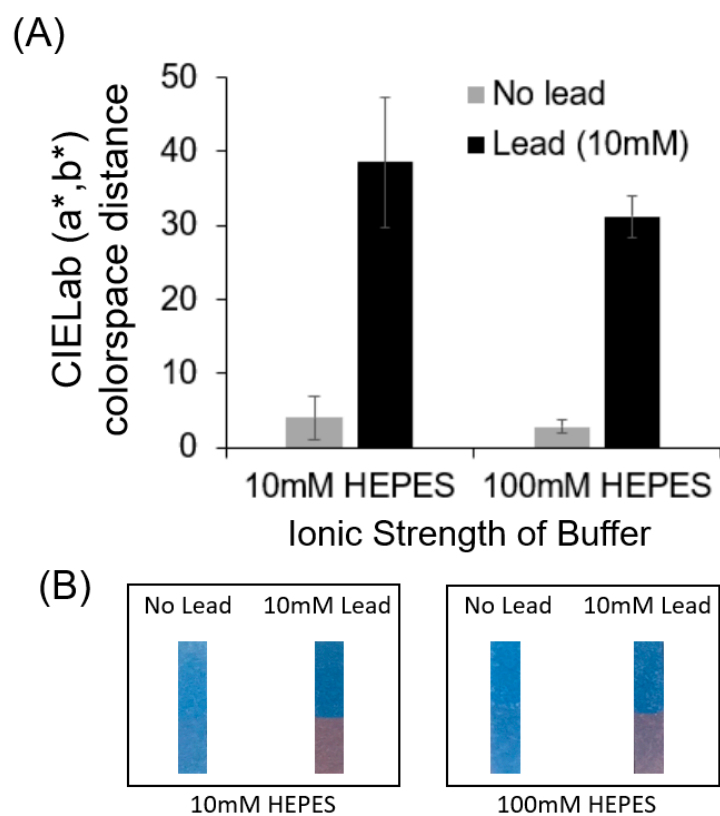

**Figure S2.** A) Examining the effect of ionic strength of the carrier buffer (HEPES) on the response of the test strips to lead nitrate. CIELab ( $a^*$ ,  $b^*$ ) distance for lead sensor strips exposed to 10mM of lead nitrate or no lead nitrate using a buffer of either 10mM or 100mM HEPES. B) Images of test strips after partial submersion in lead nitrate solution of respective HEPES concentrations for 5 minutes showing that both 10mM HEPES and 100 mM HEPES had similar blue-to-red color responses to lead ions.

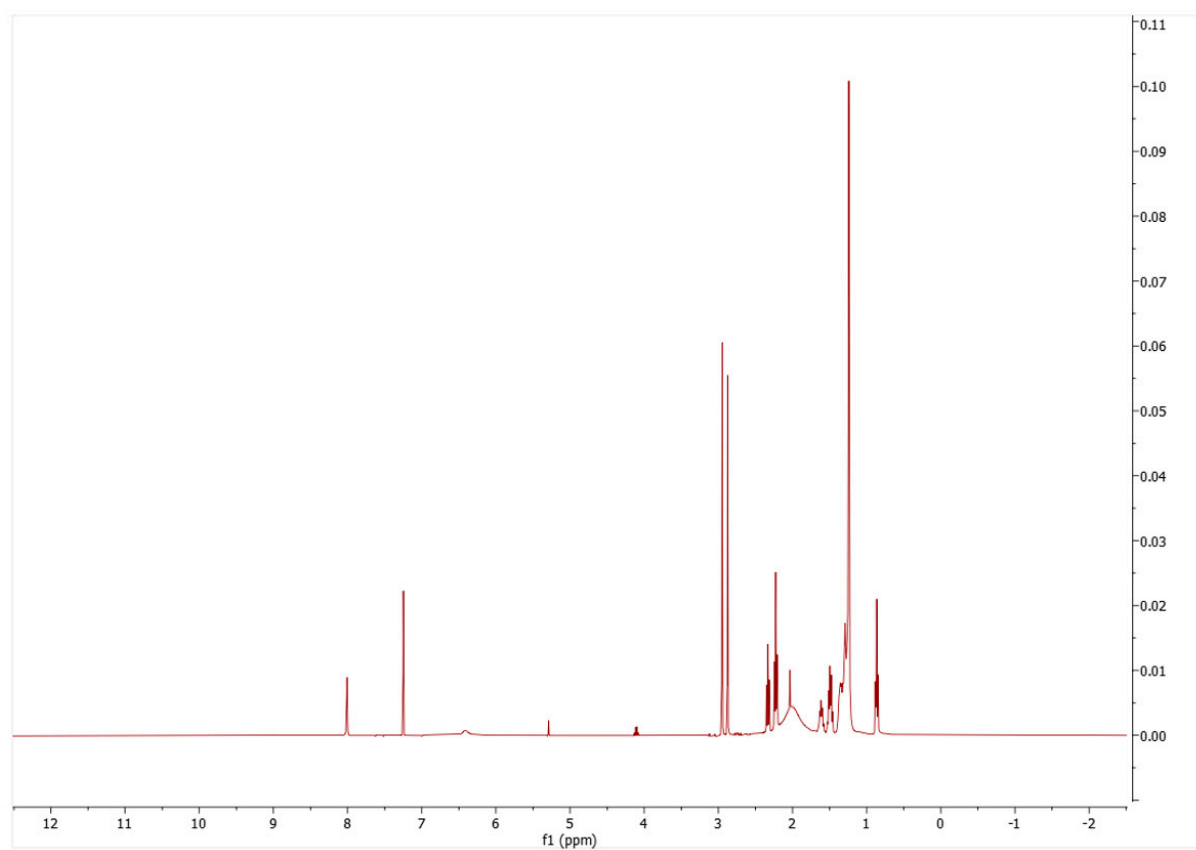

**Figure S3.**  $^1\text{H}$  NMR spectra of product N-(2-(bis(2-pyridylmethyl) amino) ethyl) pentacos-10,12diynamide (400 MHz,  $\text{CDCl}_3$ ).
